# Supplementary material
Source: PubMed Central journal article supplement (PMC5361549)
Supplement: SD10.pdf [file SD10.pdf]

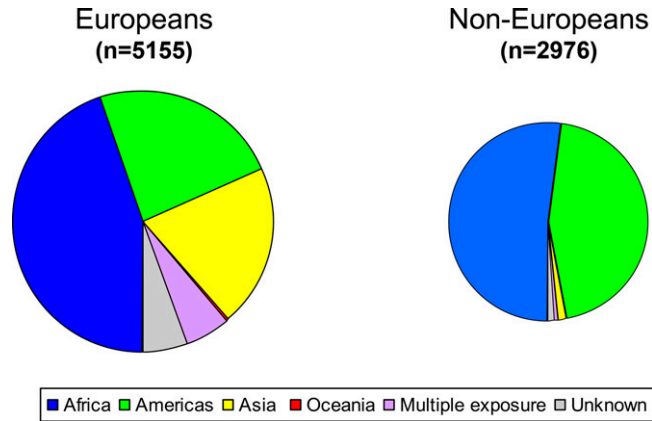

SUPPLEMENTAL FIGURE 1. Distribution of population study according to birthplace (European vs. non-European subjects) and region of exposure. The size of pie charts is proportional to the number of subjects studied.

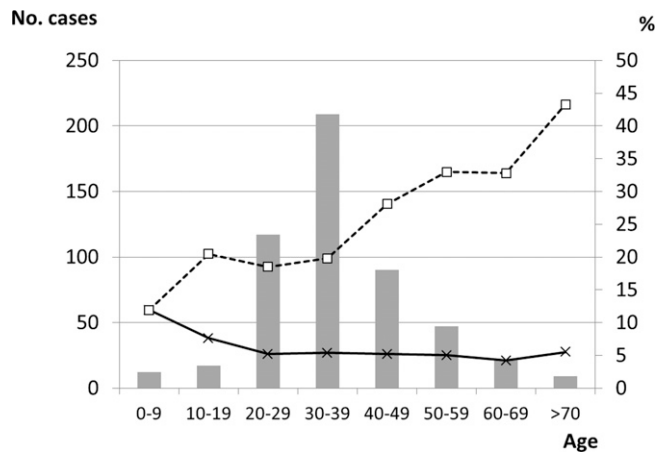

SUPPLEMENTAL FIGURE 2. Number of cases (and rate) of dengue by groups of age. x—x: rate of cases. □—□: rate of past infections.

SUPPLEMENTAL TABLE 1  
Distribution of cases of dengue by years and region of exposure (last country visited)

| Region of exposure               | Years |      |      |      |      |      |      |      |      | Total |
|----------------------------------|-------|------|------|------|------|------|------|------|------|-------|
|                                  | 2005  | 2006 | 2007 | 2008 | 2009 | 2010 | 2011 | 2012 | 2013 |       |
| Africa                           | 8     | 14   | 37   | 17   | 17   | 27   | 14   | 15   | 40   | 189   |
| Northern Africa                  |       |      | 1    |      |      |      |      | 1    | 2    | 4     |
| Algeria                          |       |      |      |      |      |      |      |      | 1    | 1     |
| Egypt                            |       |      | 1    |      |      |      |      |      |      | 1     |
| Sudan                            |       |      |      |      |      |      |      |      | 1    | 1     |
| Tunisia                          |       |      |      |      |      |      |      | 1    |      | 1     |
| Sub-Saharan Africa               | 8     | 14   | 36   | 17   | 17   | 27   | 14   | 14   | 38   | 185   |
| Eastern Africa                   | 2     | 2    | 5    |      | 2    | 3    | 3    | 2    | 6    | 25    |
| Ethiopia                         |       |      | 3    |      |      |      |      |      | 1    | 4     |
| Kenya                            | 1     | 1    |      |      | 2    | 1    | 1    | 2    | 1    | 9     |
| Madagascar                       |       |      |      |      |      | 1    |      |      | 2    | 3     |
| Malawi                           |       |      | 1    |      |      | 1    |      |      |      | 2     |
| Mozambique                       | 1     |      |      |      |      |      |      |      |      | 1     |
| Rwanda                           |       |      |      |      |      |      |      |      | 1    | 1     |
| Somalia                          |       |      |      |      |      |      | 1    |      |      | 1     |
| Tanzania                         |       | 1    | 1    |      |      |      |      |      | 1    | 3     |
| Uganda                           |       |      |      |      |      |      | 1    |      |      | 1     |
| Middle Africa                    | 2     | 9    | 28   | 14   | 10   | 12   | 5    | 8    | 27   | 115   |
| Angola                           |       |      | 1    |      | 1    | 2    |      |      | 3    | 7     |
| Cameroon                         | 1     | 2    |      |      | 2    | 1    |      | 1    | 2    | 9     |
| Chad                             |       | 1    | 1    |      | 1    | 1    |      |      |      | 3     |
| Democratic Republic of the Congo |       |      |      | 2    | 1    |      | 1    |      | 3    | 8     |
| Equatorial Guinea                | 1     | 6    | 26   | 11   | 6    | 7    | 4    | 7    | 19   | 87    |
| Gabon                            |       |      |      | 1    |      |      |      |      |      | 1     |
| Southern Africa                  | 1     |      |      |      |      |      |      |      |      | 1     |
| Swaziland                        | 1     |      |      |      |      |      |      |      |      | 1     |
| Western Africa                   | 3     | 3    | 2    | 3    | 5    | 12   | 6    | 4    | 5    | 43    |
| Benin                            |       |      |      | 1    |      | 1    |      |      |      | 2     |
| Burkina Faso                     |       |      |      |      | 1    |      |      |      | 1    | 2     |
| Gambia                           |       |      |      |      |      |      | 1    | 2    |      | 3     |
| Ghana                            |       |      |      |      | 1    | 1    |      |      |      | 2     |
| Guinea                           |       |      | 1    |      |      |      |      |      |      | 1     |
| Guinea Bissau                    |       |      |      |      |      | 1    |      |      |      | 1     |
| Ivory Coast                      | 1     |      |      |      |      | 2    |      |      |      | 3     |
| Liberia                          |       |      |      |      |      | 1    | 1    |      |      | 2     |
| Mali                             | 1     | 2    |      |      | 1    | 1    |      |      |      | 5     |
| Nigeria                          |       | 1    | 1    |      | 1    | 1    | 1    | 1    | 1    | 7     |
| Senegal                          | 1     |      |      | 2    | 1    | 3    | 3    | 1    | 3    | 14    |
| Sierra Leone                     |       |      |      |      |      | 1    |      |      |      | 1     |
| Americas                         | 8     | 8    | 29   | 22   | 14   | 23   | 19   | 20   | 31   | 174   |
| Latin America and the Caribbean  | 8     | 8    | 29   | 22   | 14   | 23   | 19   | 20   | 31   | 174   |
| Caribbean                        |       | 3    | 5    | 1    | 2    | 4    | 2    | 2    | 6    | 25    |
| Cuba                             |       | 1    |      |      |      | 1    |      |      |      | 2     |
| Dominican Republic               |       | 1    | 4    | 1    | 1    | 3    |      |      | 5    | 15    |
| Haiti                            |       | 1    |      |      | 1    |      | 2    | 2    | 1    | 7     |
| Puerto Rico                      |       |      | 1    |      |      |      |      |      |      | 1     |
| Central America                  | 4     | 2    | 9    | 4    | 6    | 5    | 10   | 5    | 6    | 51    |
| Costa Rica                       | 1     |      | 2    |      | 1    |      | 4    |      | 1    | 9     |
| El Salvador                      |       | 1    | 2    |      |      |      | 1    |      |      | 4     |
| Guatemala                        | 1     |      | 2    | 2    |      | 2    | 2    |      |      | 9     |
| Honduras                         |       |      |      |      |      |      | 2    |      | 1    | 3     |
| Mexico                           |       |      | 2    | 1    | 2    | 1    |      | 3    | 2    | 11    |
| Nicaragua                        | 2     | 1    | 1    |      | 1    | 2    |      | 2    |      | 9     |
| Panama                           |       |      |      | 1    | 2    |      | 1    |      | 2    | 6     |
| South America                    | 4     | 3    | 14   | 17   | 6    | 14   | 7    | 13   | 19   | 97    |
| Argentina                        |       |      | 1    |      |      |      |      |      |      | 1     |
| Bolivia                          |       |      | 5    | 6    | 2    | 1    | 3    | 4    | 5    | 26    |
| Brazil                           | 1     | 1    | 2    | 4    | 1    | 3    | 1    | 1    | 5    | 19    |
| Colombia                         | 1     |      | 1    | 1    | 1    | 3    |      | 4    | 2    | 13    |
| Ecuador                          |       | 1    |      | 3    | 1    | 1    | 1    | 1    | 3    | 11    |
| French Guiana                    |       |      |      |      |      | 1    |      |      |      | 1     |
| Paraguay                         |       | 1    |      |      |      | 1    | 1    | 1    | 2    | 6     |
| Peru                             |       |      | 1    | 1    |      | 2    | 1    | 1    | 1    | 7     |
| Uruguay                          |       |      |      | 1    |      |      |      | 1    |      | 2     |
| Venezuela                        | 2     |      | 4    | 1    | 1    | 2    |      |      | 1    | 11    |

(continued)

SUPPLEMENTAL TABLE 1  
Continued

| Region of exposure | Years |      |      |      |      |      |      |      |      | Total |
|--------------------|-------|------|------|------|------|------|------|------|------|-------|
|                    | 2005  | 2006 | 2007 | 2008 | 2009 | 2010 | 2011 | 2012 | 2013 |       |
| Asia               | 9     | 6    | 12   | 13   | 11   | 25   | 8    | 10   | 19   | 113   |
| Eastern Asia       |       |      |      |      |      |      |      |      | 1    | 1     |
| China              |       |      |      |      |      |      |      |      | 1    | 1     |
| Southern Asia      | 6     | 5    | 6    | 6    | 6    | 14   | 3    | 6    | 6    | 58    |
| Bangladesh         |       |      |      |      |      | 1    |      | 1    |      | 2     |
| Bhutan             |       |      |      |      | 1    |      |      |      |      | 1     |
| India              | 4     | 5    | 6    | 6    | 5    | 13   | 3    | 5    | 5    | 52    |
| Nepal              |       |      |      |      |      |      |      |      | 1    | 1     |
| Sri Lanka          | 2     |      |      |      |      |      |      |      |      | 2     |
| Southeastern Asia  | 3     | 1    | 6    | 7    | 5    | 11   | 5    | 4    | 12   | 54    |
| Cambodia           | 2     |      |      | 1    |      | 2    |      |      | 1    | 6     |
| Philippines        |       |      | 1    |      |      |      | 1    | 1    |      | 3     |
| Indonesia          |       | 1    | 3    |      | 2    | 5    |      |      | 2    | 13    |
| Myanmar            | 1     |      | 1    |      |      |      |      |      |      | 2     |
| Thailand           |       |      | 1    | 5    | 1    | 2    | 3    | 1    | 8    | 21    |
| Viet Nam           |       |      |      | 1    | 2    | 2    | 1    | 2    | 1    | 9     |
| Oceania            |       |      |      |      |      | 1    |      |      | 1    | 2     |
| Papua New Guinea   |       |      |      |      |      | 1    |      |      |      | 1     |
| French Polynesia   |       |      |      |      |      |      |      |      | 1    | 1     |
| Unknown            | 3     | 3    | 4    | 1    | 1    | 1    |      | 1    |      | 14    |
| Total              | 28    | 31   | 82   | 53   | 43   | 77   | 41   | 46   | 91   | 492   |
